# Supplementary material for: Difructose dianhydride improves intestinal calcium absorption, wound healing, and barrier function
Source: PubMed Central journal article supplement (PMC5959885; doi:10.1038/s41598-018-26295-7), 2018-05-18
Supplement: 41598_2018_26295_MOESM1_ESM.pdf [file 41598_2018_26295_MOESM1_ESM.pdf]

# Difuctose dianhydride improves intestinal calcium absorption, wound healing, and barrier function

Sang In Lee and In Ho Kim \*

Whole blot image of Figure 10D.

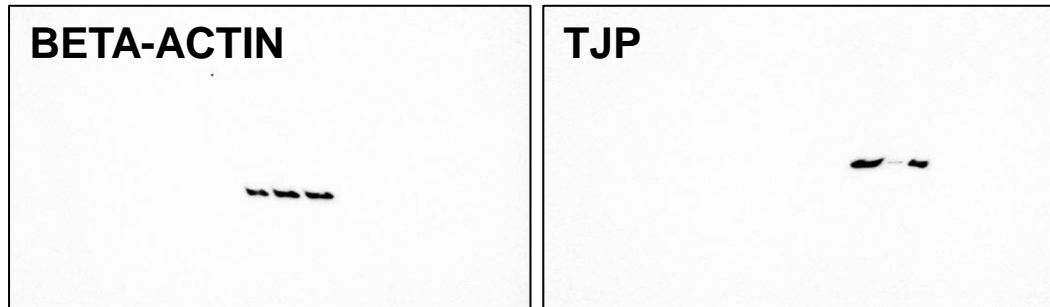

## Difructose dianhydride improves intestinal calcium absorption, wound healing, and barrier function

**Sang In Lee and In Ho Kim \***

Supplemental table 1. Composition of control diet (as-fed-basis)

| Item                              | Phase I | Phase II |
|-----------------------------------|---------|----------|
| <b>Ingredients (%)</b>            |         |          |
| Corn                              | 56.95   | 60.44    |
| Soybean meal, 45% CP              | 29.25   | 25.33    |
| Corn gluten meal, 60% CP          | 4.44    | 3.83     |
| Tallow                            | 3.61    | 5.00     |
| Limestone                         | 0.91    | 1.02     |
| Dicalcium phosphate               | 2.07    | 1.93     |
| Salt                              | 0.32    | 0.37     |
| DL-Methionine                     | 0.33    | 0.37     |
| L-Lysine-HCl                      | 1.68    | 1.28     |
| L-Threonine                       | 0.18    | 0.18     |
| Choline chloride                  | 0.10    | 0.10     |
| Vitamin premix <sup>1</sup>       | 0.06    | 0.05     |
| Trace mineral premix <sup>2</sup> | 0.10    | 0.10     |
| <b>Calculated Composition</b>     |         |          |
| Metabolizable energy, kcal/kg     | 3,050   | 3,200    |
| Crude protein, %                  | 21.00   | 19.00    |
| Lysine, % %                       | 1.40    | 1.20     |
| Calcium, %                        | 0.90    | 0.90     |
| Total Phosphorus, %               | 0.71    | 0.66     |

<sup>1</sup>Provided per kg of complete diet: vitamin A, 11,025 IU; vitamin D3, 1,103 IU; vitamin E, 44 IU; vitamin K, 4.4 mg; riboflavin, 8.3 mg; niacin, 50 mg; thiamine, 4 mg; pantothenic acid, 29 mg; choline, 166 mg; and vitamin B12, 33 µg

<sup>2</sup>Provided per kg of complete diet: Cu, 12 mg; Zn, 85 mg; Mn, 8 mg; I, 0.28 mg; and Se, 0.15 mg

Supplemental table 2. list of primers

| Gene symbol | Description                                                             | Accession No. | Primers (5' --> 3')   |                      |
|-------------|-------------------------------------------------------------------------|---------------|-----------------------|----------------------|
|             |                                                                         |               | Forward               | Reverse              |
| SLC8A1      | solute carrier family 8 (sodium/calcium exchanger), member 1            | NM_001079473  | TCGTACCCCCGACAGACTAC  | GCCACCTTACTGGCAAATGT |
| SLC8B1      | (solute carrier family 8 (sodium/lithium/calcium exchanger), member 1)  | XM_015294864  | CTTCGAGCTGAGCAACACTG  | CCCACACCCACCAGAATATC |
| SLC24A1     | solute carrier family 24 (sodium/potassium/calcium exchanger), member 1 | NM_001001773  | AACAGCCTTACAGCGAGGAA  | CTGGACGGTGTTTTGTGATG |
| ATP2A1      | ATPase, Ca <sup>++</sup> transporting, cardiac muscle, fast twitch 1    | NM_205519     | CGCTGTCAATCAGGACAAGA  | GTCGTAAAGTGGCCGATGT  |
| ATP2B1      | ATPase, Ca <sup>++</sup> transporting, plasma membrane 1                | NM_001168002  | CTGGGCATGGGAACACTACT  | CACGACGTAATTCTCGCTCA |
| ATP13A4     | ATPase type 13A4                                                        | NM_001031314  | CCAAAGCTCCTGCTAAATGC  | ATGCCTCCTGCTCTGACAGT |
| CACNA1A     | calcium channel, voltage-dependent, P/Q type, alpha 1A subunit          | XM_015273632  | GCAGCGGGTCTATAAGCAGT  | GCGATGATGGTGGCTAAAAT |
| CACNB1      | calcium channel, voltage-dependent, beta 1 subunit                      | XM_015299530  | GGCAGCATATGGTGTGTGAC  | GGACAAAATCCTGGTGCTGT |
| CACNG1      | calcium channel, voltage-dependent, gamma subunit 1                     | NM_001278006  | CAGCTACTCCTGGTCCTTCG  | GGAGATCCCGACATCTGAAA |
| TPCN1       | two pore segment channel 1                                              | XM_004934492  | GACGGCCTGTCTCTGAGTTC  | ATCCCACTGCCTGATTTACG |
| TPCN2       | two pore segment channel 2                                              | XM_004941528  | AGGTGCTGTGGTTCCTATGG  | GCCCACGGACTTGTGTATCT |
| TPCN3       | two-pore calcium channel 3                                              | NM_001143931  | TGGGAATGGGAGTTCAAGAG  | CTGCCTCAAACATACGCTGA |
| CASR        | calcium sensing receptor                                                | XM_416491     | CTGCGTGATTTGGCTCTACA  | GGCAAAGAAGAAGCAGATGG |
| IGF1R       | insulin like growth factor 1 receptor                                   | NM_205032     | AGCATTAAAGGACGAGCTGGA | TCCTGAGTGCTTGTGAGTGG |
| IGF2R       | insulin like growth factor 2 receptor                                   | NM_204970     | AAAGAATAGGCCGTGGTGTG  | GCAGCCAAGCATATCACTCA |
| LEPR        | leptin receptor                                                         | NM_204323     | CCCCAAGACTCAACCACACT  | ACAGGCTCAGACCAGCAGAT |
| GHR         | growth hormone receptor                                                 | NM_001001293  | CTTCAGTGCAAGCGACACAT  | GGCCATGACTCTCTGCTTTC |
| MSTN        | myostatin                                                               | NM_001001461  | CAGGACCGGGTGAAGATGGA  | GGGTAGCGACAACATCGGGA |
| MYOD1       | myogenic differentiation 1                                              | NM_204214     | GGCCGCCGATGACTTCTATG  | TGCTCCTCCTCGTGTGGGTT |
| MYOG        | myogenin (myogenic factor 4)                                            | NM_204184     | AGCGATGACCAGGCAGAGGA  | CCAGCTCAGTTTTGGACCCG |

|       |                                          |              |                      |                      |
|-------|------------------------------------------|--------------|----------------------|----------------------|
| MYF5  | myogenic factor 5                        | NM_001030363 | AGGATTCGAGCCCAGGGAG  | TCATAGTGGCTGCCTTCCGC |
| MMP2  | matrix metalloproteinase 2               | NM_204420    | GCTATACCCCGGATTTGGAT | CAAAATGGGAGTCTCCTCCA |
| MMP9  | matrix metalloproteinase 9               | NM_204667    | GCTACATCCAGGAGGCAGAG | TCGGGGGAGTAGTTCATCAC |
| CDH1  | cadherin 1                               | NM_001039258 | TGTACGAAGGTGTGGTGGAA | AGCGGCTCTTGGTCTCATAA |
| CDX2  | caudal type homeobox 2                   | NM_204311    | TCAAAACCAGGACGAAGGAC | CCAGATTTTCACCTGCCTCT |
| PCNA  | proliferating cell nuclear antigen       | NM_204170    | GAGACCTCAGCCACATTGGT | AGTCAGCTGGACTGGCTCAT |
| TP53  | tumor protein p53                        | NM_000546    | GGCCCACTTCACCGTACTAA | GTGGTTTCAAGGCCAGATGT |
| RND3  | Rho family GTPase 3                      | XM_422158    | CAACATGTGGGACACCTCAG | ATTTGCAACCAACCAAAAGC |
| TJP1  | tight junction protein 1                 | XM_015278981 | AGGTGAAGTGTTTCGGGTTG | CCTCCTGCTGTCTTTGGAAG |
| TJP2  | tight junction protein 2                 | NM_204918    | GAAAGCTCCAGCTGGTTGTC | TGGATGAATGCAAATCCAGA |
| TJP3  | tight junction protein 3                 | XM_015299757 | CCATGGTGGTGTCTGTGAG  | TGAGGCTGATGGTAGCAGTG |
| OCLN  | occludin                                 | NM_205128    | GTCTGTGGGTTCTCATCGT  | GTTCTTCACCCACTCCTCCA |
| GAPDH | glyceraldehyde-3-phosphate dehydrogenase | NM_204305    | GGTGGTGCTAAGCGTGTTAT | ACCTCTGTCATCTCTCCACA |

---
